# Supplementary material for: Aristolochic acid, a plant extract used in the treatment of pain and linked to Balkan endemic nephropathy, is a regulator of K2P channels
Source: PubMed Central journal article supplement (PMC4842925; doi:10.1111/bph.13465), 2016-04-05
Supplement: BPH-173-1639-s001.pdf [file BPH-173-1639-s001.pdf]

Supplementary Figure

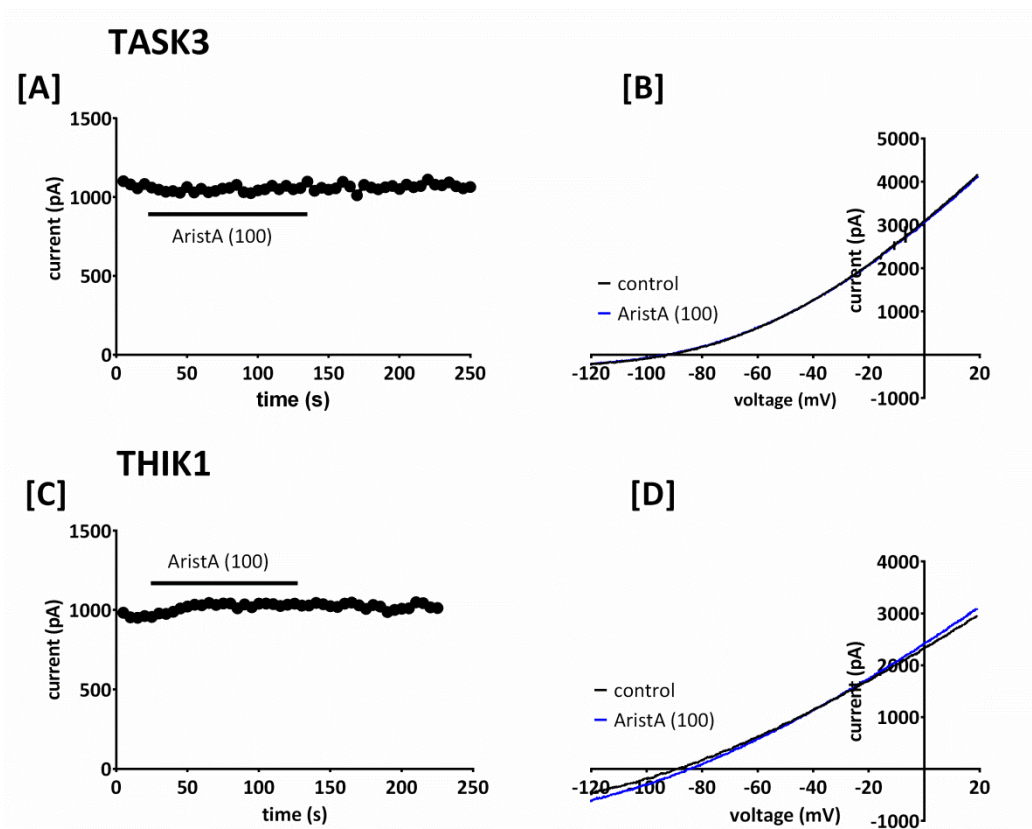

**Aristolochic acid (AristA) has no effect on the two pore domain potassium channels, TASK3 and THIK1.** (A) Time course plot showing lack of effect of AristA (100  $\mu$ M) on human TASK3. Application of AristA is indicated by the bar. (B) TASK3 currents evoked by ramp changes in voltage in control conditions and in the presence of 100  $\mu$ M AristA. (C) Time course plot showing lack of effect of AristA (100  $\mu$ M) on human THIK1. (D) THIK1 currents evoked by ramp changes in voltage in control conditions and in the presence of 100  $\mu$ M AristA.
